# Supplementary material
Source: PubMed Central journal article supplement (PMC3096943)
Supplement: NIHMS291520-supplement-1_si_001.pdf [file NIHMS291520-supplement-1_si_001.pdf]

## **Supporting Information**

### **Catalytic Mechanism of Cytochrome P450 for 5'-Hydroxylation of Nicotine: Fundamental Reaction Pathways and Stereoselectivity**

Dongmei Li,<sup>a,b</sup> Xiaoqin Huang,<sup>b</sup> Keli Han,<sup>a,\*</sup> and Chang-Guo Zhan<sup>b,\*</sup>

*<sup>a</sup>State Key Laboratory of Molecular Reaction Dynamics, Dalian Institute of Chemical Physics, Chinese Academy of Sciences, Dalian 116023, People's Republic of China and <sup>b</sup>Department of Pharmaceutical Sciences, College of Pharmacy, University of Kentucky, 789 South Limestone Street, Lexington, Kentucky 40536*

**Running Title:** P450-catalyzed nicotine 5'-hydroxylation

#### **Correspondence:**

Chang-Guo Zhan, Ph.D.

Professor

Department of Pharmaceutical Sciences

College of Pharmacy

University of Kentucky

789 South Limestone Street

Lexington, KY 40536

TEL: 859-323-3943

FAX: 859-323-3575

E-mail: [zhan@uky.edu](mailto:zhan@uky.edu)

**Supporting Information Available:** More information about the energetic results and the detailed reaction pathways; complete citations of refs. 43 and 53. This material is available free of charge *via* the Internet at <http://pubs.acs.org>.

---

\* Corresponding authors. E-mail: [zhan@uky.edu](mailto:zhan@uky.edu) and [klhan@dicp.ac.cn](mailto:klhan@dicp.ac.cn)

## More information about the energetic results and the detailed reaction pathways

Table S1. Computational binding free energies (in kcal/mol) according to the initial docking and final MM-PBSA calculations

|         | SR <sub>t</sub> | SR <sub>c</sub> | SS    | SRH   | SSH   | SRHH  | SSHH  |
|---------|-----------------|-----------------|-------|-------|-------|-------|-------|
| Docking | -5.44           | -4.43           | -5.28 | -5.32 | -5.64 | -5.22 | -5.30 |
| MM-PBSA | -6.86           | -5.42           | N/A   | -2.04 | -4.73 | -6.11 | -6.02 |

Table S2. Relative free energies (in kcal/mol) calculated at the QM/MM(B3LYP/B2:AMBER) level using the geometries optimized at the QM/MM(B3LYP/B1:AMBER) level with and without the FEP simulations. The free energies listed include the zero-point and thermal corrections for the QM subsystem.

|                   | QM/MM(B3LYP/B2:AMBER)          |         | QM/MM(B3LYP/B2:AMBER)-<br>FEP |         |
|-------------------|--------------------------------|---------|-------------------------------|---------|
|                   | <i>trans</i> -5'-hydroxylation |         |                               |         |
| Structure         | Quartet                        | Doublet | Quartet                       | Doublet |
| RC                | 0.0                            | 0.0     | 0.0                           | 0.0     |
| TS <sub>H</sub>   | 15.8                           | 15.4    | 16.9                          | 14.1    |
| IM                | -1.2                           | 0.2     | -0.1                          | -2.0    |
| TS <sub>reb</sub> | -1.2                           | 1.1     | 0.0                           | -0.9    |
| PC                | -52.7                          | -47.2   | -49.8                         | -49.4   |
|                   | <i>cis</i> -5'-hydroxylation   |         |                               |         |
| Structure         | Quartet                        | Doublet | Quartet                       | Doublet |
| RC                | 0.0                            | 0.0     | 0.0                           | 0.0     |
| TS <sub>H</sub>   | 14.7                           | 13.0    | 16.5                          | 14.4    |
| IM                | 1.2                            | -1.1    | 3.3                           | 1.5     |
| TS <sub>reb</sub> | 1.6                            | -0.4    | 3.6                           | 2.4     |
| PC                | -54.4                          | -50.5   | -52.2                         | -48.1   |

In the *trans*-5'-hydroxylation pathway, the potential energy surface which is determined by QM/MM reaction coordinate calculations at the B3LYP/B1:AMBER level clearly shows two transition states (TS<sub>H</sub> and TS<sub>reb</sub>). The geometries of the reactant complex, transition states, intermediates and product complexes were verified by the full geometry optimizations followed by harmonic normal mode calculations at the same QM/MM level (B3LYP/B1:AMBER). (*S*)-(-)-Nicotine and Cpd I initially form the reactant complex, <sup>4/2</sup>RC, in which the distance between the *trans*-5'-hydrogen and the oxygen of Cpd I is 2.74/2.63 Å. In the geometry of the first transition state, <sup>4/2</sup>TS<sub>H</sub>, the C-H distance is 1.30/1.26 Å, the O-H distance is 1.32/1.38 Å, and the C-H-O angle is 177.2°/176.2°. Thus, the transition state, <sup>4/2</sup>TS<sub>H</sub>, has a structure associated with hydrogen-transfer with partially broken C-H bond, partially formed O-H bond, and almost linear arrangement of the C-H-O portion. The high spin density ( $\rho_{\text{nic}} = 0.57/-0.50$  in <sup>4/2</sup>TS<sub>H</sub>) and low charge ( $Q_{\text{nic}} = 0.09/0.10$  in <sup>4/2</sup>TS<sub>H</sub>) on the (*S*)-(-)-nicotine moiety indicate that the transition state involves hydrogen-transfer of the radical type. In the geometry of intermediate <sup>4/2</sup>IM, where the *trans*-5'-hydrogen has been transferred to the oxygen of Cpd I, the distance between the hydrogen of the iron-hydroxo complex and the carbon of the (*S*)-(-)-nicotine moiety is 2.64/2.58 Å. It is apparent that, in the intermediate <sup>4/2</sup>IM, the (*S*)-(-)-nicotine moiety is still coordinated to the hydroxyl group of the iron-hydroxo complex. In <sup>4/2</sup>IM, the spin density of the (*S*)-(-)-nicotine moiety is 0.93/-0.90 and the charge is 0.06/0.09, which further indicates that the H-transfer step involves hydrogen-transfer of the radical type. The second transition state <sup>4/2</sup>TS<sub>reb</sub> is associated with the OH group rotation, *i.e.* the C-Fe-O-H dihedral angle increasing relative to the <sup>4/2</sup>IM species. The dihedral C-Fe-O-H of <sup>4/2</sup>IM is 21.3/5.7°, and it increases to 41.9/57.0° in <sup>4/2</sup>TS<sub>reb</sub>. In <sup>4/2</sup>TS<sub>reb</sub>, the distance from the hydrogen to the carbon of the (*S*)-(-)-nicotine moiety is 2.79/3.47 Å. Once the OH group snaps out of the weak OH-C interaction, the C-O bond between the (*S*)-(-)

)-nicotine moiety and the hydroxyl group of the iron-hydroxo complex gradually forms, and the Fe-O bond gradually breaks. In the product complex  ${}^{4/2}\text{PC}$ , the hydroxyl group is covalently bonded with the carbon atom at the *trans*-5'-position of  $\text{SR}_t$  while the Fe-O bond no longer exists.

As in the *trans*-5'-hydroxylation pathway, the potential energy surface in the *cis*-5'-hydroxylation process also shows two transition states ( $\text{TS}_H$  and  $\text{TS}_{\text{reb}}$ ). In the optimized reactant complex  ${}^{4/2}\text{RC}$ , the *cis*-5'-hydrogen of  $\text{SR}_c$  is 2.21/2.21 Å from the oxygen of Cpd I. The transition state  ${}^{4/2}\text{TS}_H$  involves a partially broken C-H bond ( $R_{\text{C-H}} = 1.28/1.24$  Å) and a partially formed H-O bond ( $R_{\text{H-O}} = 1.31/1.38$  Å), with a C-H-O angle of 175.7/175.6°. The  ${}^{4/2}\text{TS}_H$  structure involves a hydrogen transfer of the radical type, as evidenced from the large spin density ( $\rho_{\text{nic}} = 0.58/-0.48$ ) and the small charge ( $Q_{\text{nic}} = 0.06/0.06$ ) on the (*S*)-(-)-nicotine moiety. This is consistent with the finding that the spin density of the (*S*)-(-)-nicotine moiety is 0.94/-0.88 and the charge is 0.06/0.10 in the formed intermediate  ${}^{4/2}\text{IM}$ . In  ${}^{4/2}\text{IM}$ , the hydrogen atom forms a covalent bond with the oxygen of Cpd I, and the (*S*)-(-)-nicotine moiety is still coordinated to the hydroxyl group of the iron-hydroxo complex as the distance from the hydrogen of the iron-hydroxo complex to the carbon of (*S*)-(-)-nicotine moiety is 2.29/2.18 Å. In the rebound transition state,  ${}^{4/2}\text{TS}_{\text{reb}}$ , the distance from the hydrogen to the carbon of (*S*)-(-)-nicotine moiety is 2.40/2.33 Å. The C-Fe-O-H dihedral angle increased from 16.6/12.4° in  ${}^{4/2}\text{IM}$  to 34.2/30.7° in  ${}^{4/2}\text{TS}_{\text{reb}}$ . After the rebound transition state, the (*S*)-(-)-nicotine moiety and the hydroxyl group of the iron-hydroxo complex gradually forms a C-O bond, while the Fe-O bond gradually breaks. Finally, the product *cis*-5'-hydroxynicotine is formed.

Summarized in Table S2 are the free energy barriers (the zero-point and thermal corrections for the QM subsystem) calculated for (*S*)-(-)-nicotine 5'-hydroxylation at the QM/MM(B3LYP/B2:AMBER) level with and without FEP simulations. The data in Table S2

reveal that the calculated free energy barriers without the FEP simulations favor the *cis*-5'-hydroxylation reaction by 2.4 kcal/mol. With the FEP simulations, the calculated free energy barrier of the *trans*-5'-hydroxylation is very close to that of the *cis*-5'-hydroxylation. The QM/MM-FEP-calculated free energy barriers are 14.1 kcal/mol (*trans*-5'-hydroxylation) and 14.4 kcal/mol (*cis*-5'-hydroxylation). Thus, the dynamic effects of the protein environment exert a remarkable effect on the free energy barriers for the catalytic 5'-hydroxylation reaction processes.

### Complete citations of refs. 43 and 53

(43) Frisch, M. J.; Trucks, G. W.; Schlegel, H. B.; Scuseria, G. E.; Robb, M. A.; Cheeseman, J. R.; Montgomery, J. A., Jr.; Vreven, T.; Kudin, K. N.; Burant, J. C.; Millam, J. M.; Iyengar, S. S.; Tomasi, J.; Barone, V.; Mennucci, B.; Cossi, M.; Scalmani, G.; Rega, N.; Petersson, G. A.; Nakatsuji, H.; Hada, M.; Ehara, M.; Toyota, K.; Fukuda, R.; Hasegawa, J.; Ishida, M.; Nakajima, T.; Honda, Y.; Kitao, O.; Nakai, H.; Klene, M.; Li, X.; Knox, J. E.; Hratchian, H. P.; Cross, J. B.; Bakken, V.; Adamo, C.; Jaramillo, J.; Gomperts, R.; Stratmann, R. E.; Yazyev, O.; Austin, A. J.; Cammi, R.; Pomelli, C.; Ochterski, J. W.; Ayala, P. Y.; Morokuma, K.; Voth, G. A.; Salvador, P.; Dannenberg, J. J.; Zakrzewski, V. G.; Dapprich, S.; Daniels, A. D.; Strain, M. C.; Farkas, O.; Malick, D. K.; Rabuck, A. D.; Raghavachari, K.; Foresman, J. B.; Ortiz, J. V.; Cui, Q.; Baboul, A. G.; Clifford, S.; Cioslowski, J.; Stefanov, B. B.; Liu, G.; Liashenko, A.; Piskorz, P.; Komaromi, I.; Martin, R. L.; Fox, D. J.; Keith, T.; Al-Laham, M. A.; Peng, C. Y.; Nanayakkara, A.; Challacombe, M.; Gill, P. M. W.; Johnson, B.; Chen, W.; Wong, M. W.; Gonzalez, C.; Pople, J. A. *Gaussian 03*, Revision C.02; Gaussian, Inc.: Wallingford, CT, 2004.

(53) Case, D. A.; Darden, T. A.; T.E. Cheatham, III.; Simmerling, C. L.; Wang, J.; Duke, R. E.; Luo, R.; Merz, K. M.; Wang, B.; Pearlman, D. A.; Crowley, M.; Brozell, S.; Tsui, V.; Gohlke, H.; Mongan, J.; Hornak, V.; Cui, G.; Beroza, P.; Schafmeister, C.; Caldwell, J. W.; Ross, W. S.; Kollman, P. A. *Amber 8*; University of California: San Francisco, 2004.
